# Supplementary material for: The Role of Pirfenidone in the Treatment of Interstitial Pneumonia With Autoimmune Features
Source: Research Square preprint supplement (doi:10.21203/rs.3.rs-99703/v1), 2020-11-02
Supplement: Supplementary file 1 [file ed40d69ca0f6fda3906d6aba.docx]

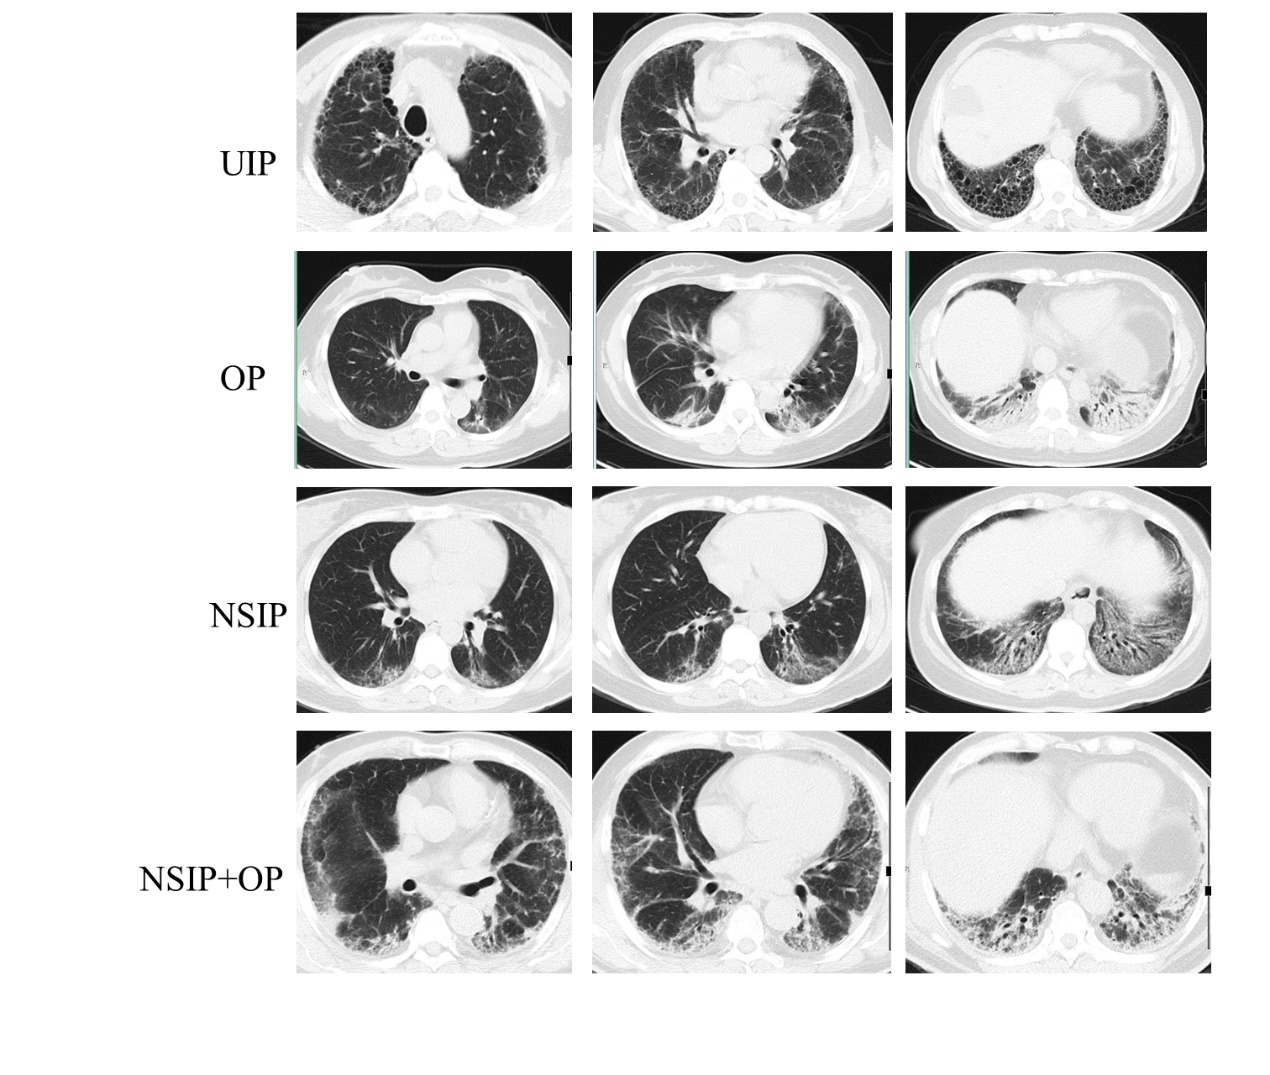


**Figure S1. Typical chest CT images of the four pathological types.**

Patients with typical CT lesions of UIP, NSIP, OP, and NSIP+OP were selected from the cohort. Three different layers of CT images from these patients are displayed.
